# Supplementary material for: SAMBA: Structure-Learning of Aquaculture Microbiomes Using a Bayesian Approach
Source: Genes (Basel). 2023 Aug 19;14(8):1650. doi: 10.3390/genes14081650 (PMC10454057; doi:10.3390/genes14081650)
Supplement: Supplementary file 1 [file genes-14-01650-s001.zip]

Archive with 4 entries (4 files):
- Supplementary_file_S1.pdf
- Supplementary_file_S2.xlsx
- Supplementary_file_S3.xlsx
- Supplementary_file_S4.xlsx
